# Supplementary material for: Visualization of oxygen profile in reconstructed human epidermis by phosphorescence-lifetime imaging microscopy using Ir(III) complex
Source: Research Square preprint supplement (doi:10.21203/rs.3.rs-7014965/v1), 2025-07-29
Supplement: Supplementary file 1 [file 2b2f0d3b18e8b5c01de0980b.docx]

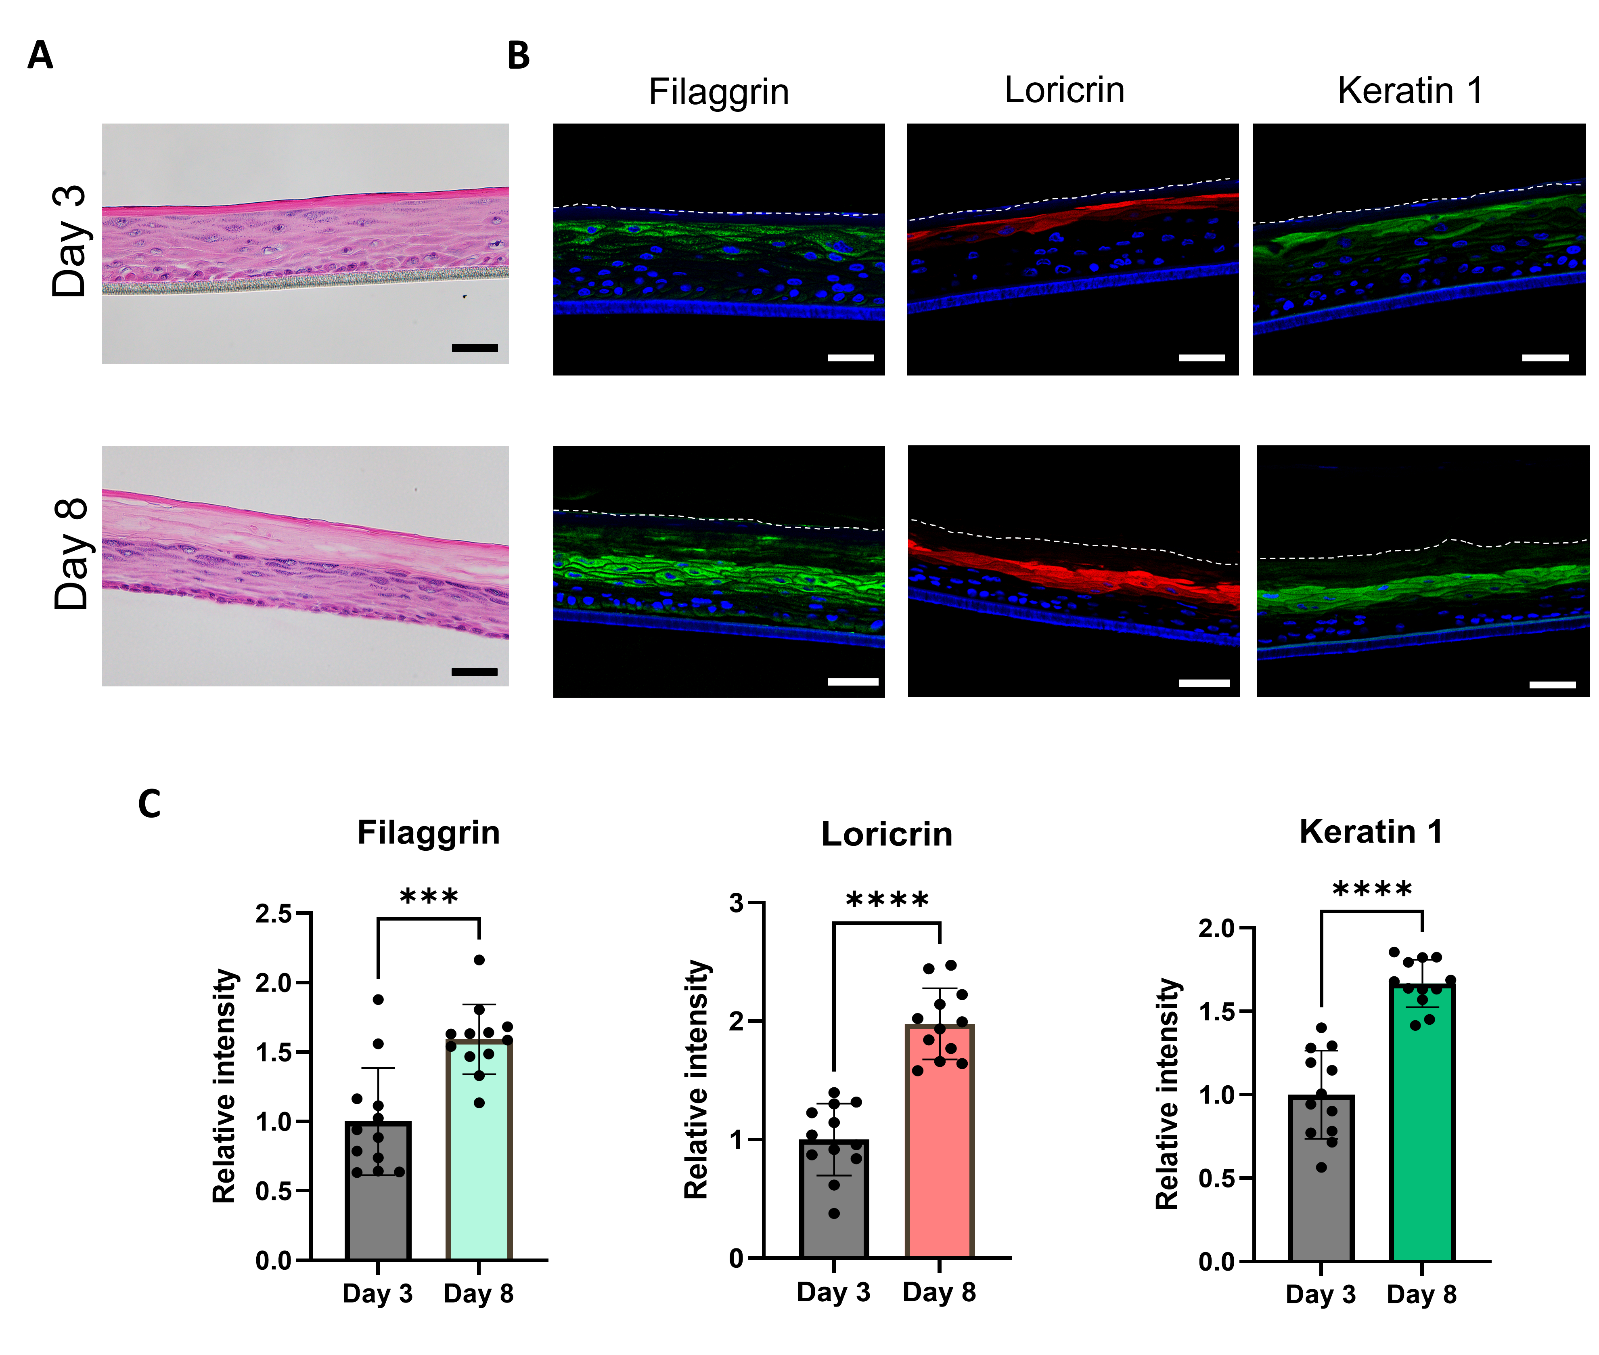


Supplementary Figure 1


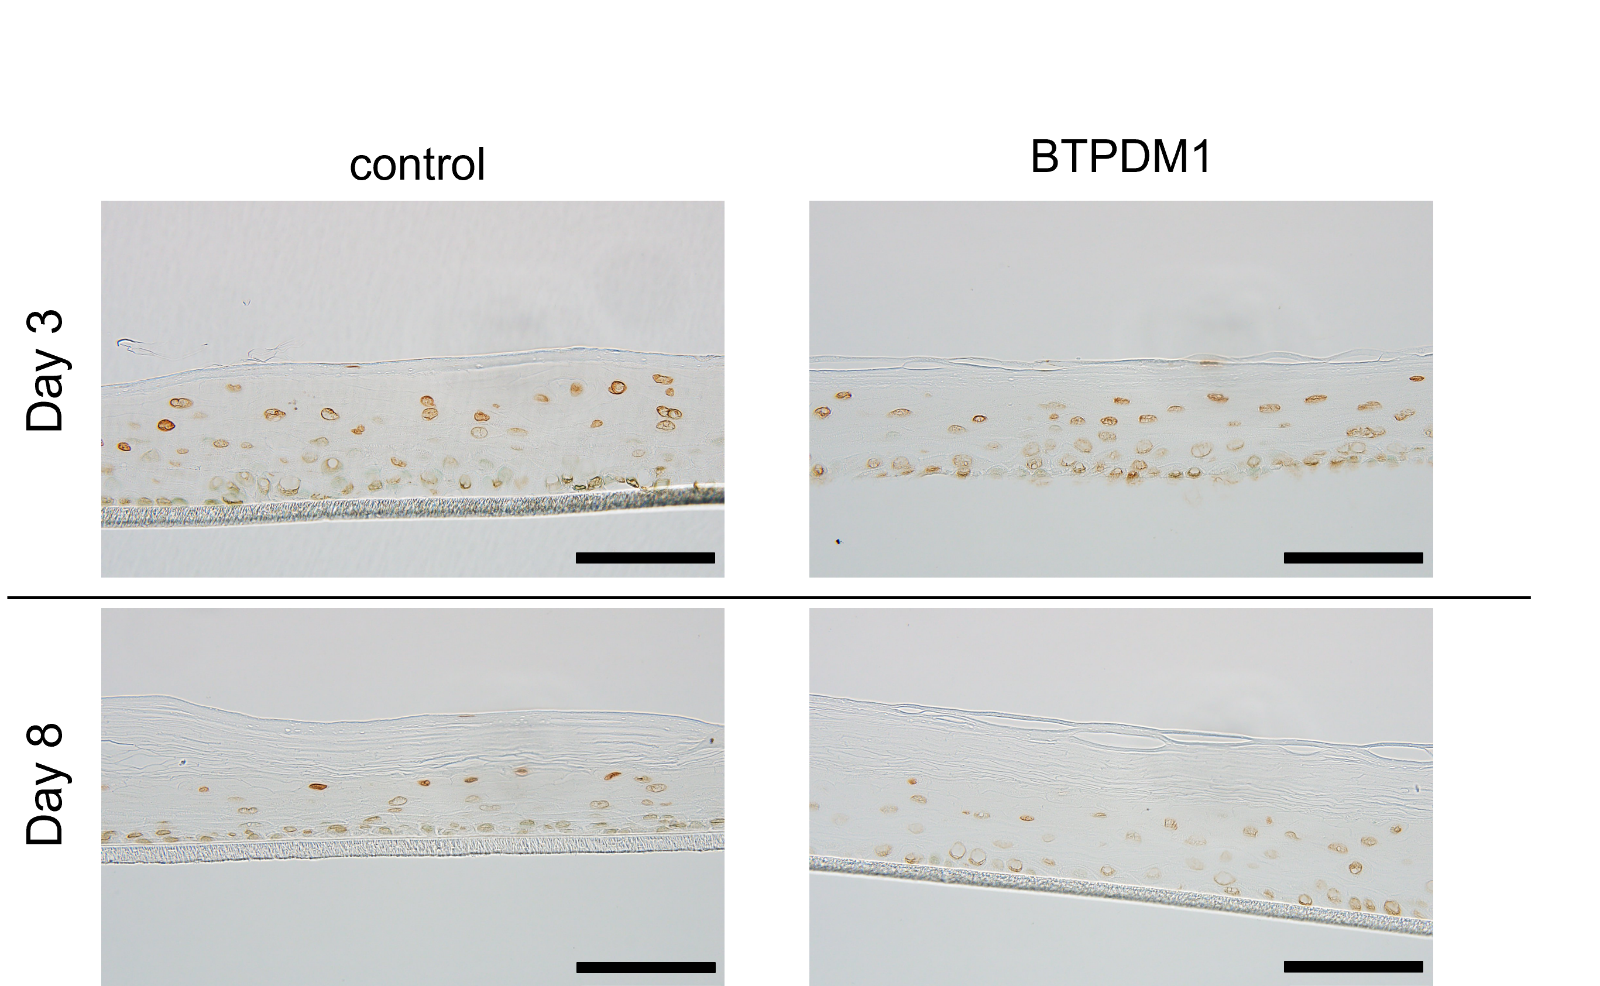


Supplementary Figure 2


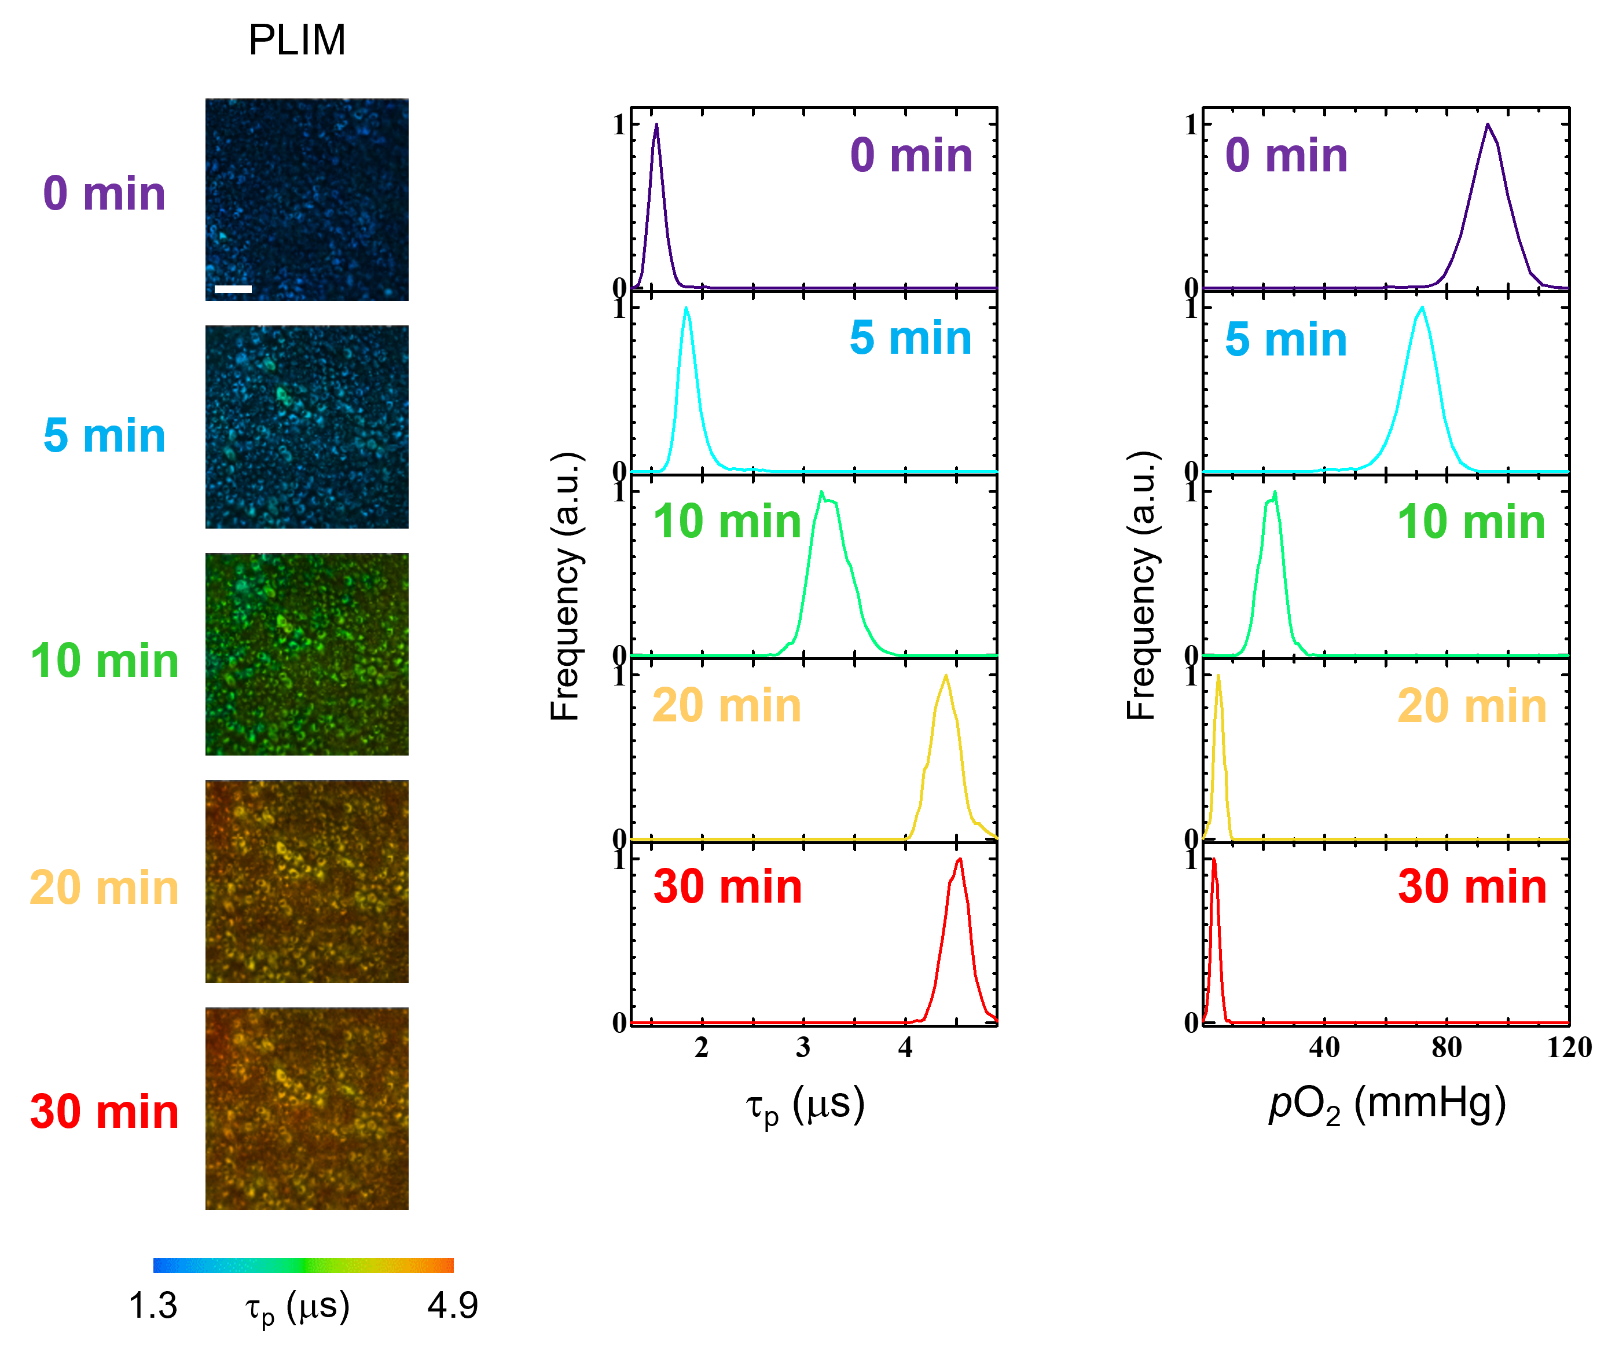


Supplementary Figure 3


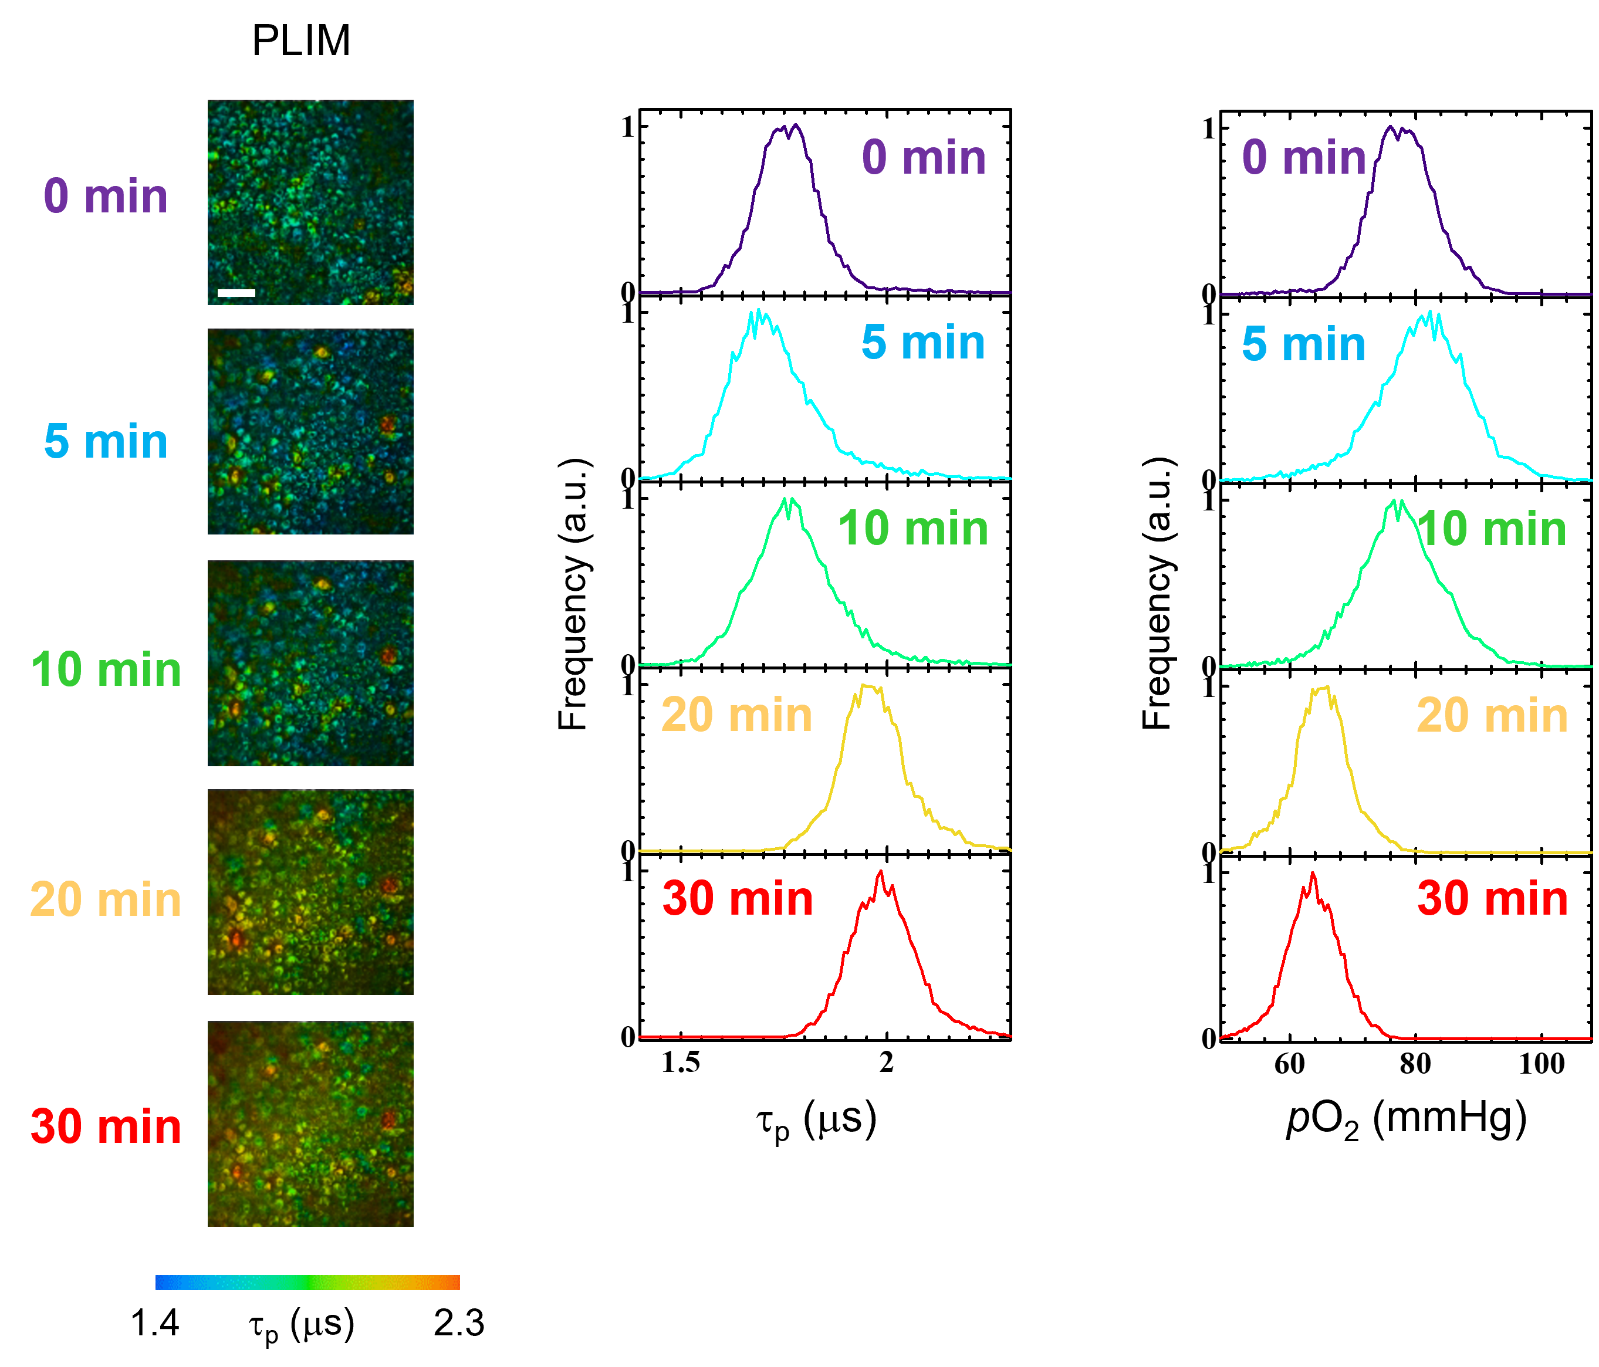


Supplementary Figure 4


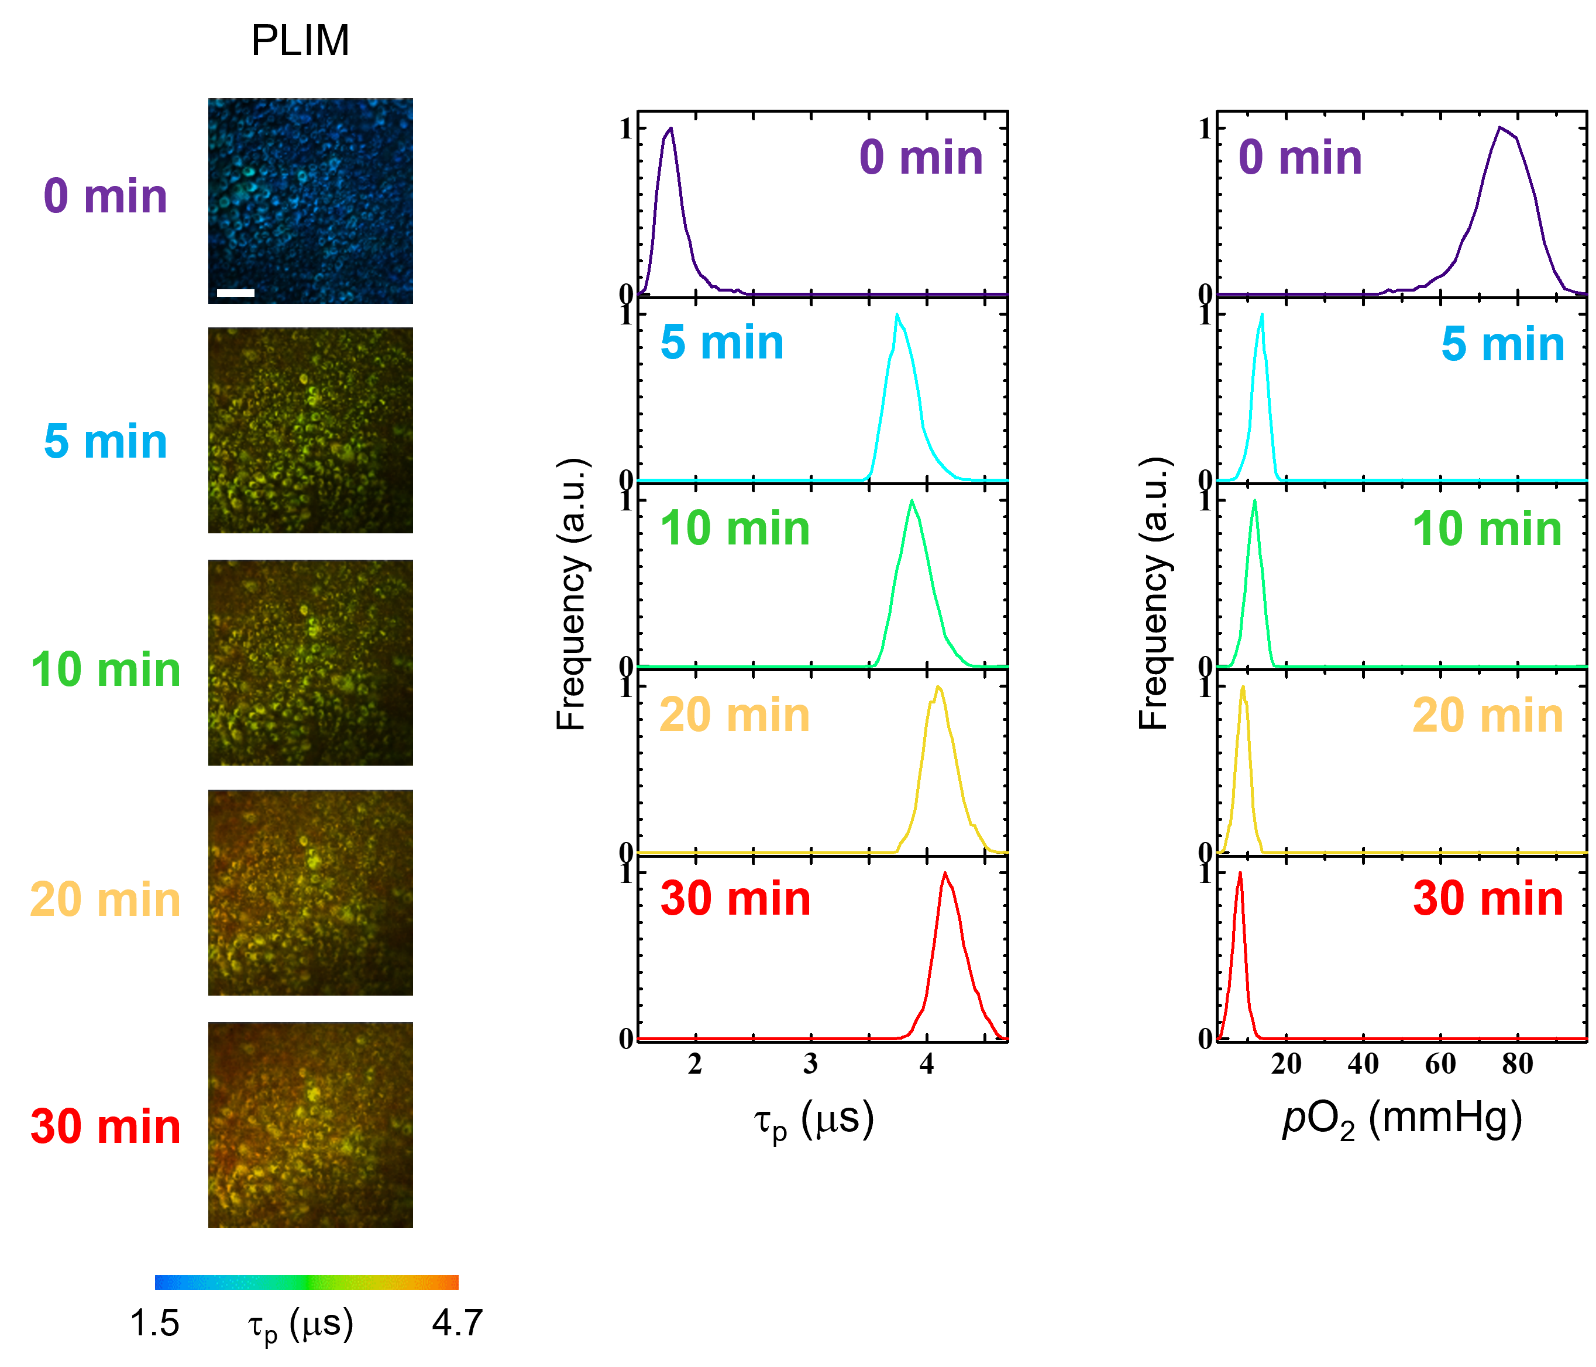


Supplementary Figure 5


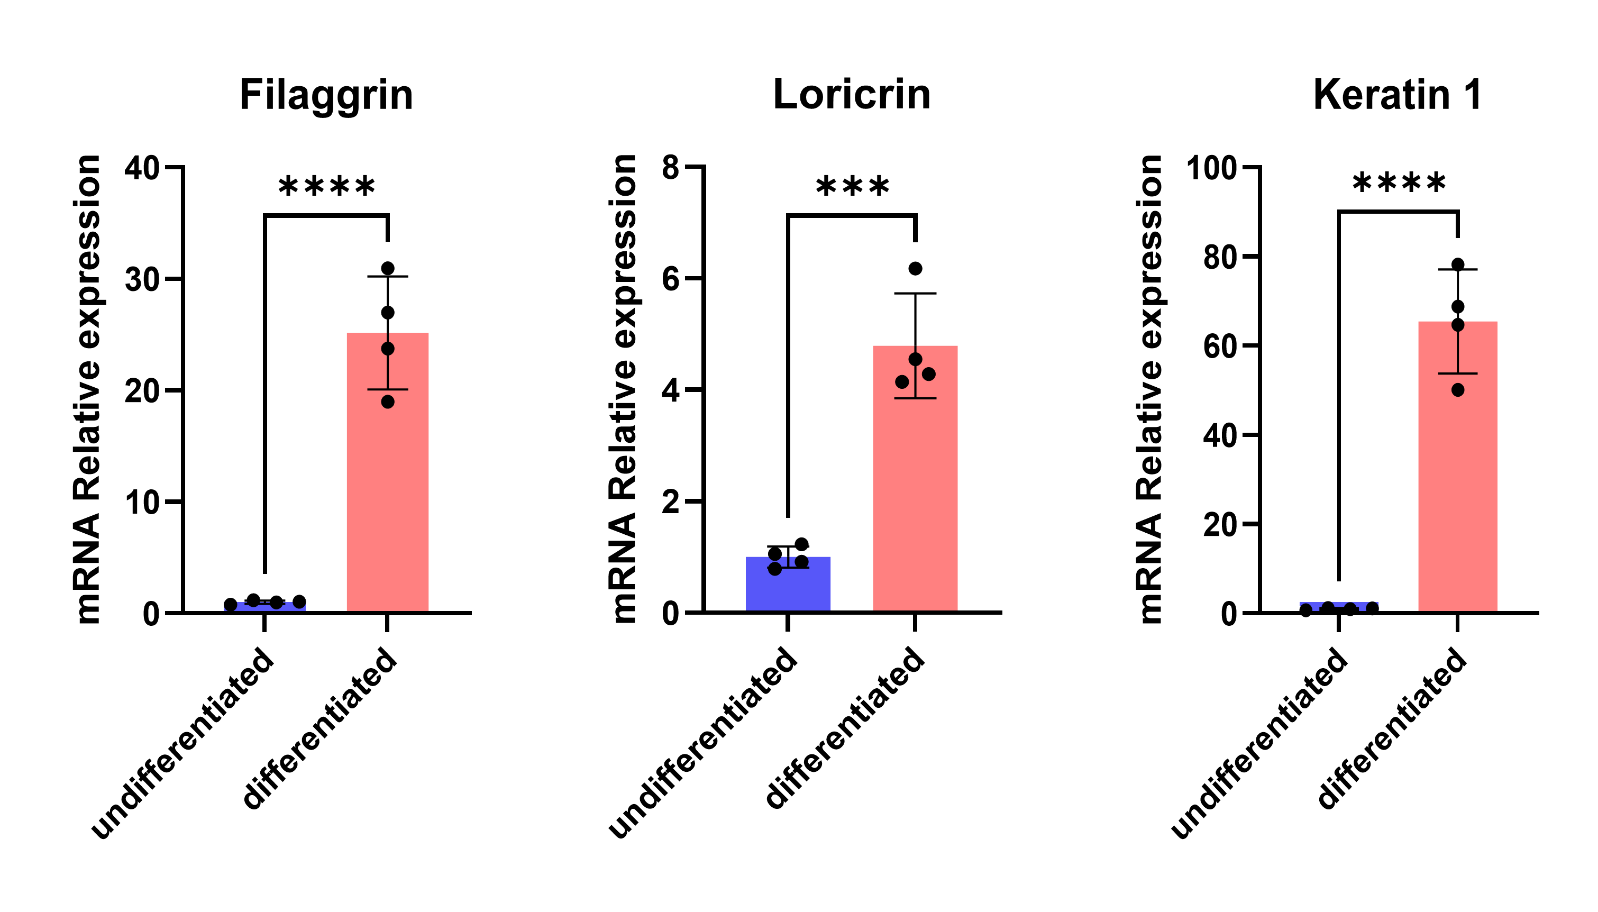


Supplementary Figure 6
